# Supplementary material for: Genetic and In Vitro Characteristics of a Porcine Circovirus Type 3 Isolate from Northeast China
Source: MDPI journal article supplement (doi:10.3390/vetsci10080517), 2023-08-10
Supplement: s1 [file s1]

## Supplementary Materials

Table S1 Detection of PCV3-DB-1 passage in cell lines by qPCR.

| Cell lines | PCV3 qPCR Results |      |      |      |      |      | Control |
|------------|-------------------|------|------|------|------|------|---------|
|            | P1                | P2   | P3   | P4   | P5   | P6   |         |
| PK-15      | 14.5              | 20.3 | 22.4 | 23.6 | 27.4 | 32.1 | —       |
| Vero       | 33.3              | —    | —    | —    | —    | —    | —       |
| ST         | 18.4              | 34.7 | —    | —    | —    | —    | —       |
| DF1        | —                 | —    | —    | —    | —    | —    | —       |

—: higher than Ct cut-off value; Each number represents the average Ct values generated from at least three times detection. PK-15: porcine kidney cell line; Vero: African green monkey kidney cell line; ST: Swine testicular cell line; DF1: chicken embryonic fibroblast cell line.

Table S2 Detection of PCV3-DB-1 passage in primary cells by qPCR.

| Primary Cells | PCV3 qPCR Results |      |      |    |    |    | Control |
|---------------|-------------------|------|------|----|----|----|---------|
|               | P1                | P2   | P3   | P4 | P5 | P6 |         |
| PAM           | 27.3              | 30.5 | 35.2 | —  | —  | —  | —       |
| PBMC          | —                 | —    | —    | —  | —  | —  | —       |
| BEpC          | 25.8              | 34.7 | —    | —  | —  | —  | —       |

—: higher than Ct cut-off value; Each number represents the average Ct values generated from at least three times detection. PAM: pulmonary alveolar macrophages; PBMC: peripheral blood mononuclear cell; BEpC: epithelial cells bronchial epithelial cells.
